# Supplementary material for: A Simple and Convenient Synthesis of Unlabeled and 13C-Labeled 3-(3-Hydroxyphenyl)-3-Hydroxypropionic Acid and Its Quantification in Human Urine Samples
Source: MDPI journal article supplement (doi:10.3390/metabo8040080), 2018-11-21
Supplement: s1 [file s1]

## Supplementary Materials for:

# A simple and convenient synthesis of unlabeled and $^{13}\text{C}$ labeled 3-(3-hydroxyphenyl)-3-hydroxypropionic acid and its quantification in human urine samples

Yeganeh Khaniani, Matthias Lipfert, Dipanjan Bhattacharyya, Rolando Perez Pineiro, Jiamin Zheng and David S. Wishart

### Method Validation for HPPHA

#### Calibration Regression

The calibration regression of our LC-MS organic acid assay was evaluated by using seven analyte standard mixture solutions prepared in water. Among all the analytes, concentrations of HPPHA were 5  $\mu\text{M}$ , 10  $\mu\text{M}$ , 20  $\mu\text{M}$ , 40  $\mu\text{M}$ , 80  $\mu\text{M}$ , 160  $\mu\text{M}$  and 400  $\mu\text{M}$ , respectively. All seven standard mixtures were prepared in triplicate. The ratios of the signal intensity (peak area) of HPPHA to  $^{13}\text{C}$ -HPPHA were plotted against the known concentrations of HPPHA to build the calibration curves. Due to the 80 times change between the highest and lowest concentrations of the calibrants, quadratic regression was used instead of linear regression.

#### Accuracy and Precision

To evaluate accuracy and precision, three different concentration levels (low, medium, high) for all analytes, with HPPHA as one of the analytes, were prepared in triplicate, along with one set of calibration curve standards. All these solutions were measured using the method described above and used to calculate the coefficient of variation (CV) expressed as a percentage.

#### Recovery

Recovery was assessed by analyzing pooled human urine (purchased from Lee Biosolutions) that had been spiked at three different concentrations for all analytes including HPPHA. Each spiked sample was prepared in triplicate. Aliquots of non-spiked pooled human urine samples were analyzed in parallel for recovery calculations. The recovery was expressed as a percentage and was calculated according to Equation 1 shown below, where  $C_{SP}$  is the calculated HPPHA concentration in the spiked pooled urine sample,  $C_{NS}$  is the calculated HPPHA concentration in the non-spiked pooled urine sample, and  $C_A$  is the theoretical concentration of HPPHA that was spiked into the sample.

$$\text{Recovery (\%)} = (C_{SP} - C_{NS})/C_A \times 100 \quad (1)$$

#### Limits of Detection and Quantification

The limit of detection (LOD) and limit of quantification (LOQ) were calculated by analyzing three replicates of the lowest concentration of HPPHA in the calibration curve according to Equations 2 and 3,

where  $SD$  is the standard deviation of the response and  $Slope$  is the slope of the calibration curve of HPHPA.

$$LOD = 3 \times SD / Slope \quad (2)$$

$$LOQ = 10 \times SD / Slope \quad (3)$$

## NMR spectra

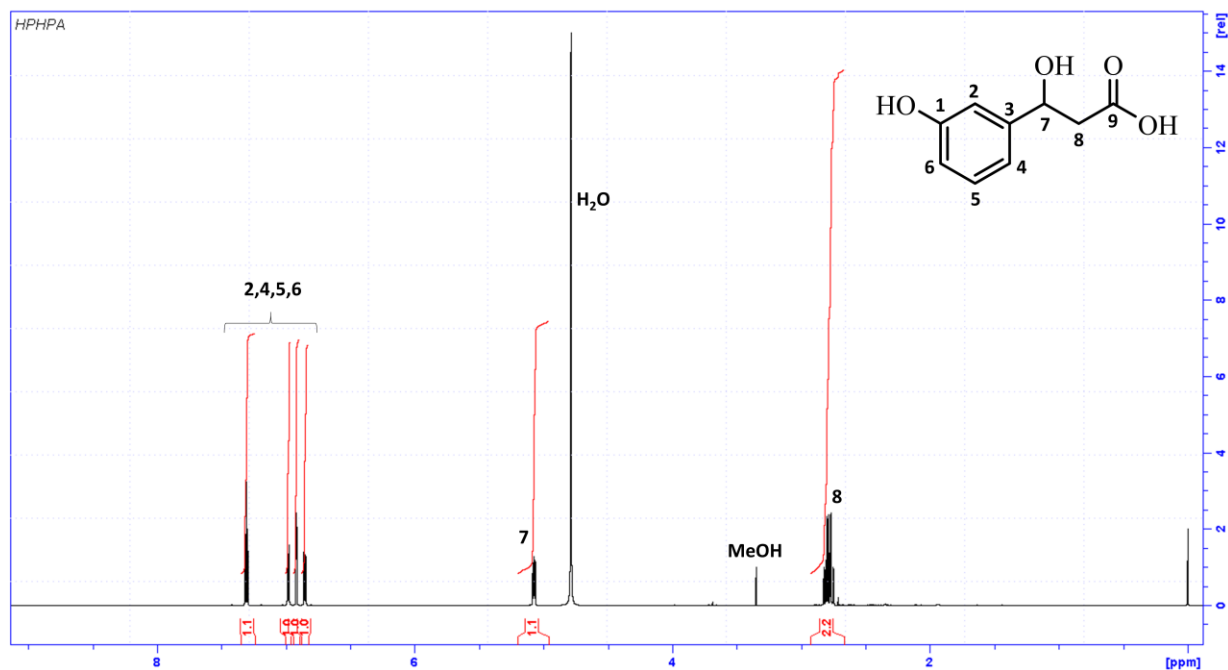

**Figure S1.** Representative  $^1\text{H}$  NMR spectra of HPPHA 4. The peak assignments are indicated with numbers on the structure.

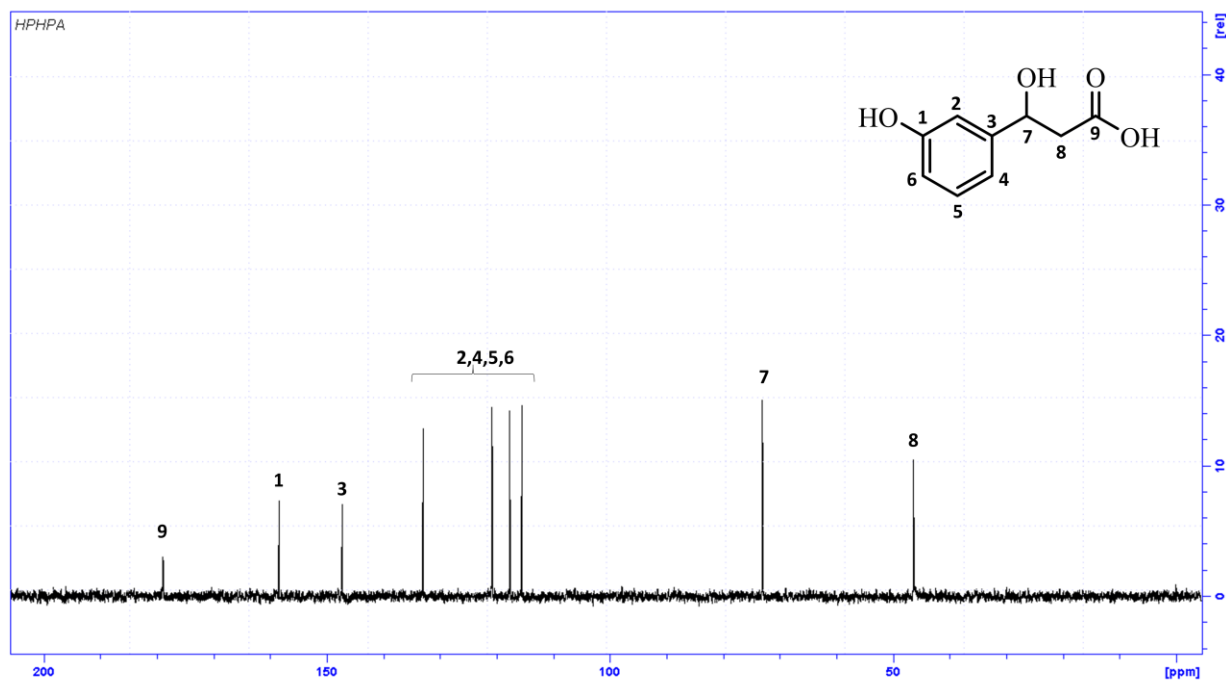

**Figure S2.** Representative  $^{13}\text{C}$  NMR spectra of HPPHA 4. The peak assignments are indicated with numbers on the structure.

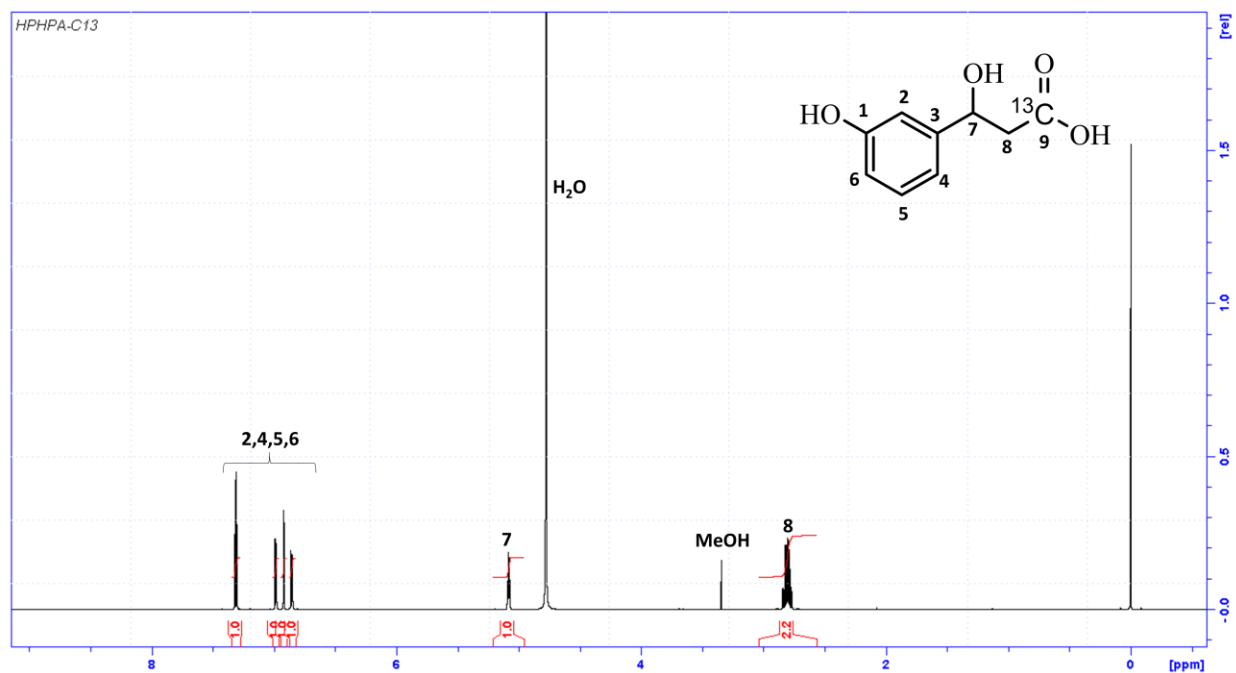

**Figure S3.** Representative  $^1\text{H}$  NMR spectra of  $^{13}\text{C}$ -labeled HPHA 5. The peak assignments are indicated with numbers on the structure.

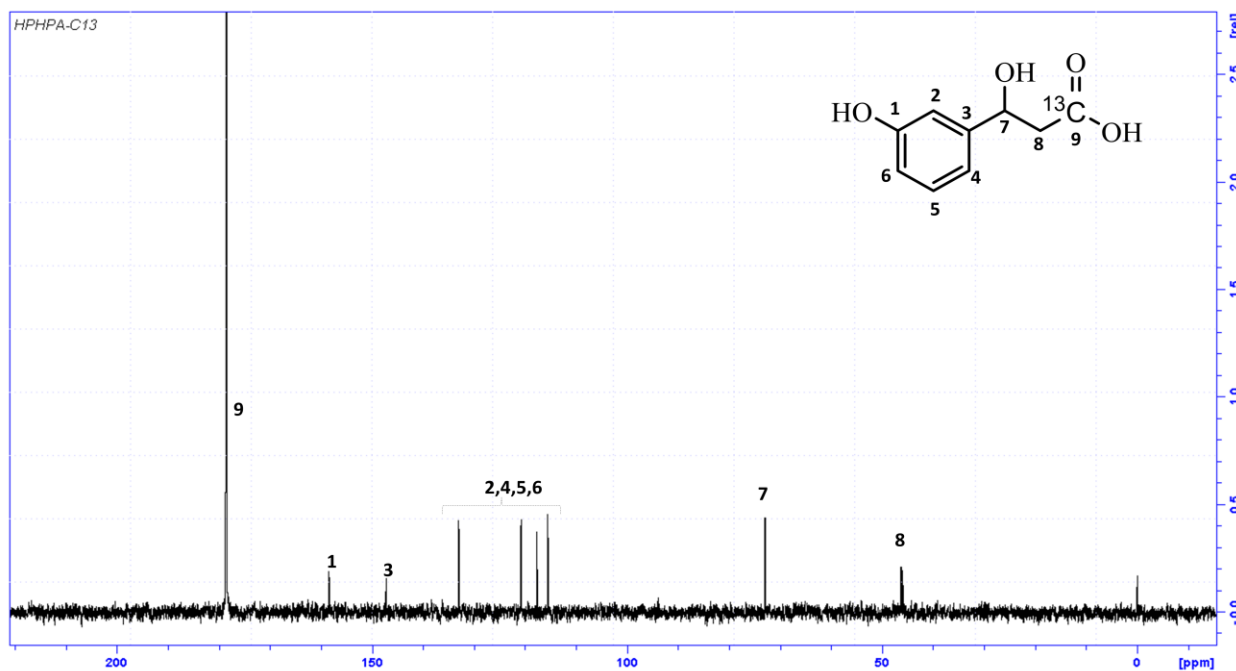

**Figure S4.** Representative  $^{13}\text{C}$  NMR spectra of labeled HPHA 5. The peak assignments are indicated with numbers on the structure.

## HPLC analysis

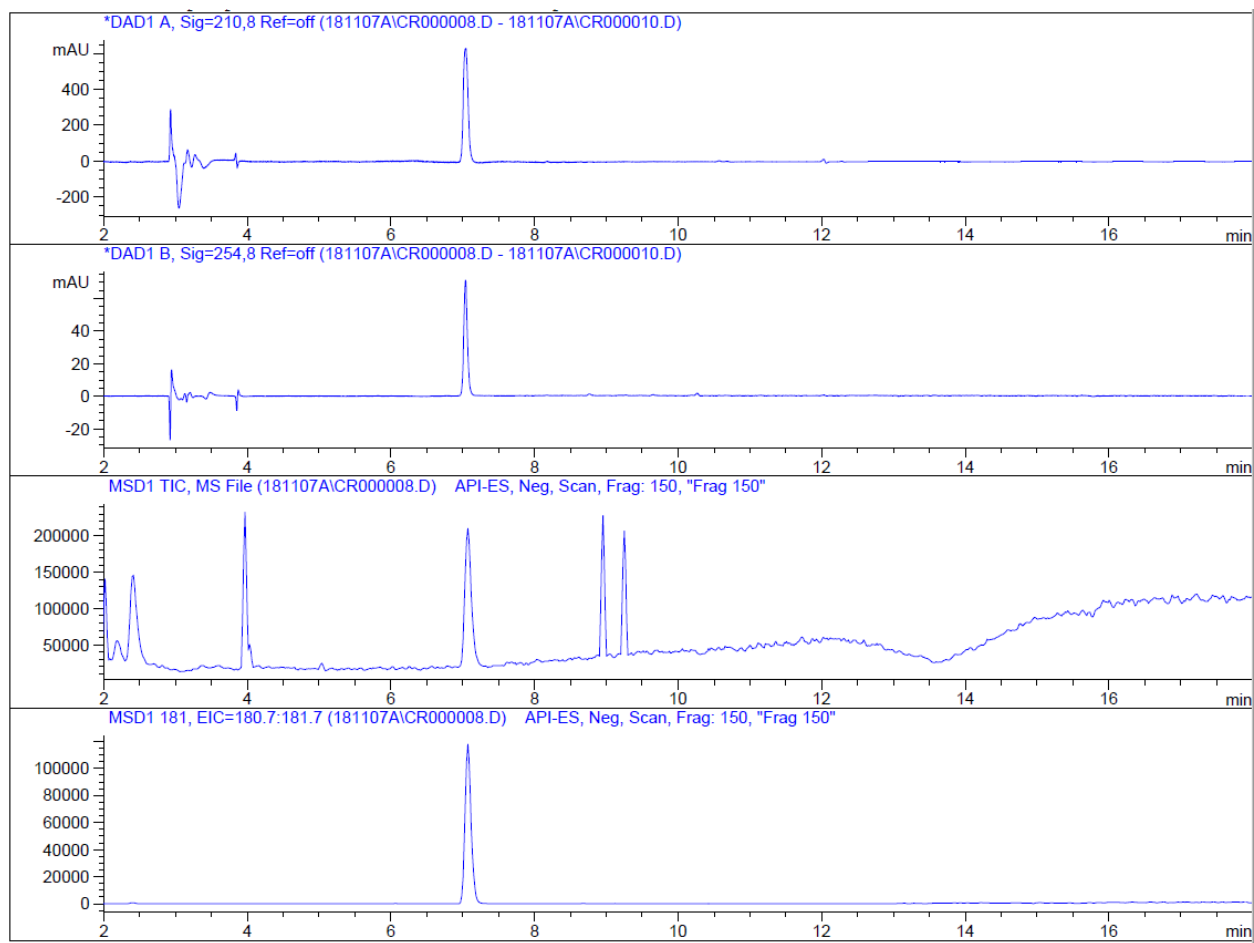

**Figure S5.** HPLC chromatogram of HPHA **4** measured at 210 and 254 nm. The retention time of HPHA was 7.04 min.

**Table S1.** Area percent report for HPHA **4**.

| Peak No. | Retention time | Type | Width (min) | Area       | Height (mAU) | Area %  |
|----------|----------------|------|-------------|------------|--------------|---------|
| 1        | 7.044          | MM   | 0.0780      | 2971.98730 | 635.02002    | 98.5876 |
| 2        | 8.173          | MM   | 0.0420      | 16.45774   | 6.52595      | 0.5459  |
| 3        | 8.784          | MM   | 0.0557      | 8.63714    | 2.58330      | 0.2865  |
| 4        | 10.569         | MM   | 0.0511      | 17.48376   | 5.70322      | 0.5800  |
| totals   |                |      |             | 3014.56594 | 649.83249    |         |

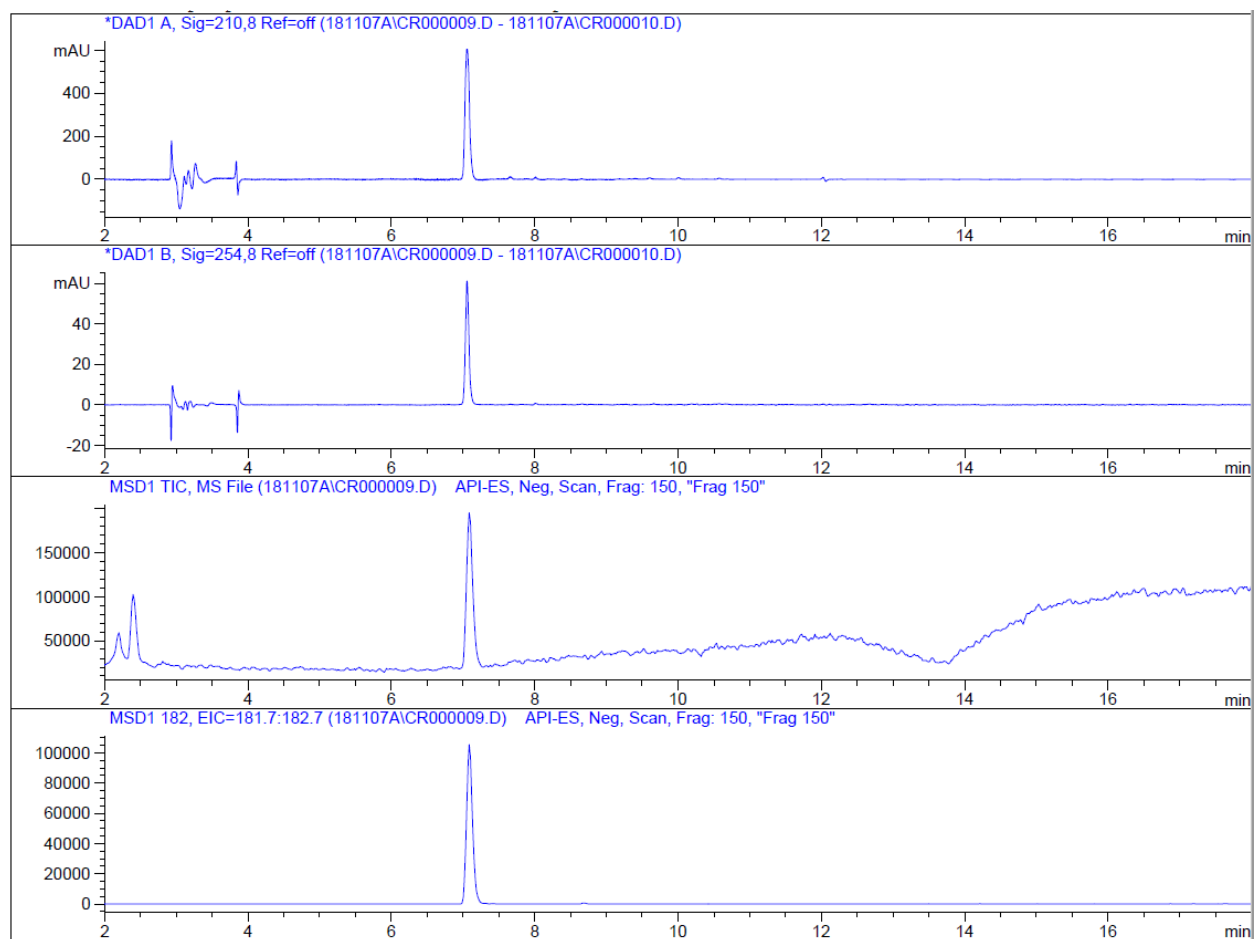

**Figure S6.** HPLC chromatogram of <sup>13</sup>C-labeled HPHPA **5** measured at 210 and 254 nm. The retention time of HPHPA was 7.06 min.

**Table S2.** Area percent report for HPHPA **5**.

| Peak No. | Retention time | Type | Width (min) | Area      | Height (mAU) | Area %  |
|----------|----------------|------|-------------|-----------|--------------|---------|
| 1        | 7.057          | MM   | 0.0579      | 214.78882 | 61.87896     | 96.1949 |
| 2        | 7.659          | MM   | 0.0755      | 1.22376   | 0.270229     | 0.5481  |
| 3        | 8.016          | MM   | 0.0474      | 2.14914   | 0.755467     | 0.9625  |
| 4        | 8.660          | MM   | 0.0463      | 1.41621   | 0.509912     | 0.6343  |
| 5        | 9.662          | MM   | 0.0335      | 1.05378   | 0.523878     | 0.4719  |
| 6        | 10.190         | MM   | 0.0510      | 1.47027   | 0.480536     | 0.6585  |
| 7        | 10.572         | MM   | 0.0453      | 1.18299   | 0.435679     | 0.5298  |
| totals   |                |      |             | 223.28498 | 64.85466     |         |

## Department of Chemistry Mass Spectrometry Laboratory

|                                                                                                                        |                                                                                                                              |
|------------------------------------------------------------------------------------------------------------------------|------------------------------------------------------------------------------------------------------------------------------|
| <b>Name</b> Y. Khairi, Viterbo, Bo. Sci.<br><b>Data Filename</b> 18032923.d<br><b>Position</b> -1<br><b>Acq Method</b> | <b>Sample Name</b> veg-168<br><b>Instrument Name</b> catOF620<br><b>Operator</b> arri<br><b>DA Method</b> da arri low mass.m |
|------------------------------------------------------------------------------------------------------------------------|------------------------------------------------------------------------------------------------------------------------------|

### User Spectra

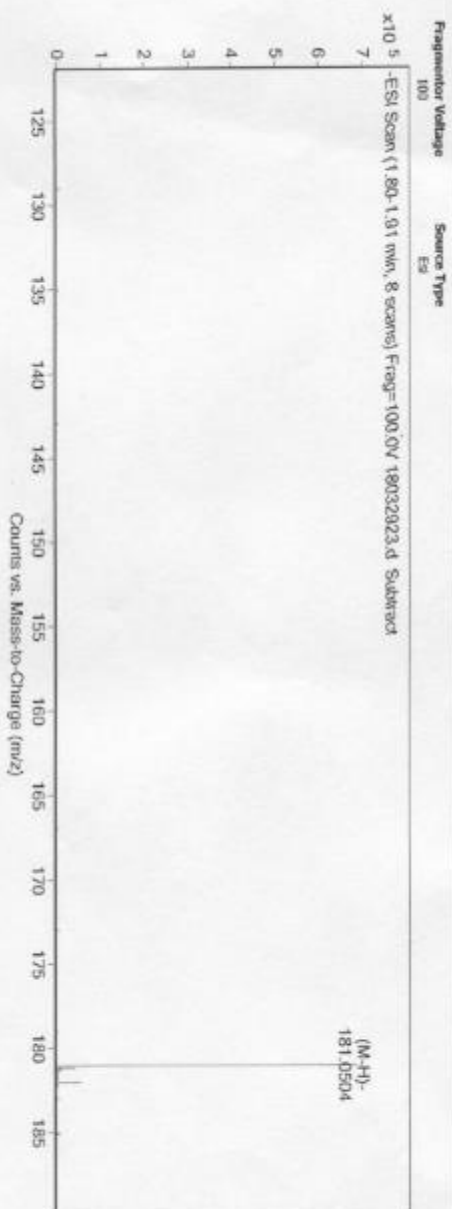

### Formula Calculator Results

| Formula   | Ion Species | Mass     | Calc. Mass | m/z      | Calc. m/z | Diff (mDa) | Diff (ppm) | DBE | Ion                | Score |
|-----------|-------------|----------|------------|----------|-----------|------------|------------|-----|--------------------|-------|
| C9 H10 O4 | [C9 H9 O4]  | 182.0577 | 182.0579   | 181.0504 | 181.0506  | 0.23       | 1.28       | 5   | (M-H) <sup>-</sup> | 80.17 |

--- End Of Report ---

**Figure S7.** HR-MS-ESI for HPHPA **4** C<sub>9</sub>H<sub>10</sub>O<sub>4</sub>.

## Department of Chemistry Mass Spectrometry Laboratory

| Name                          | Sample Name      |
|-------------------------------|------------------|
| V. Mianian, W. Shi, Bio. Sci. | veg-171          |
| Data Filename                 | Instrument Name  |
| 16032924.D                    | oaTO6220         |
| Position                      | Operator         |
| -1                            | am               |
| Acq Method                    | DA Method        |
|                               | da.am low mass.m |

### User Spectra

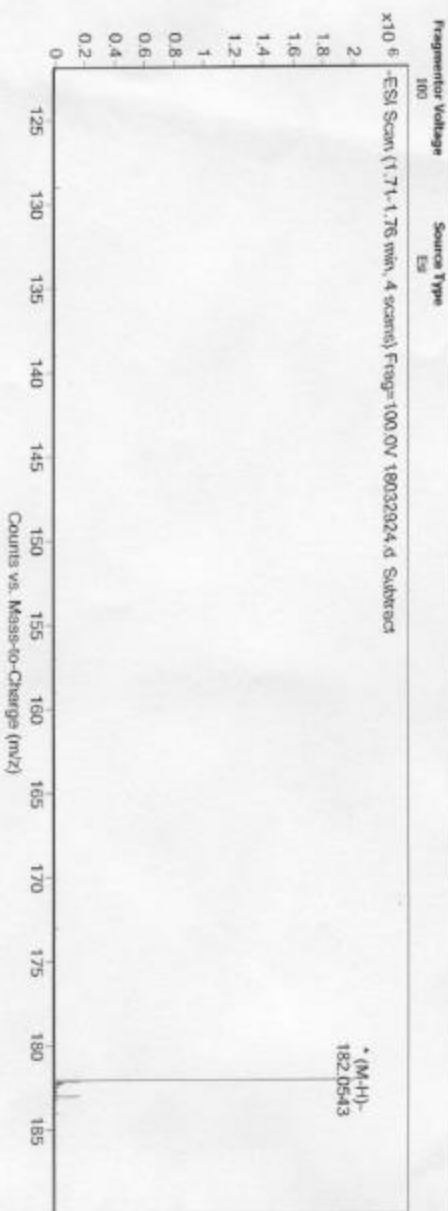

### Formula Calculator Results

| Formula                                       | Ion Species                                      | Mass     | Calc. Mass | m/z      | Calc. m/z | Diff (mDa) | Diff (ppm) | DBE | Ion                | Score |
|-----------------------------------------------|--------------------------------------------------|----------|------------|----------|-----------|------------|------------|-----|--------------------|-------|
| C <sub>8</sub> H <sub>10</sub> O <sub>4</sub> | [13C] H <sub>9</sub> O <sub>4</sub> <sup>+</sup> | 183.0616 | 183.0613   | 183.0543 | 183.054   | -0.33      | -1.8       | 5   | (M-H) <sup>+</sup> | 80.18 |

--- End Of Report ---

**Figure S8.** HR-MS-ESI for  $^{13}\text{C}$ -labeled HPPA **5**  $\text{C}_8(^{13}\text{C})\text{H}_{10}\text{O}_4$ .
